# Supplementary material
Source: PubMed Central journal article supplement (PMC4760870)
Supplement: NIHMS750471-supplement.pdf [file NIHMS750471-supplement.pdf]

## **Supplemental Information**

### **Rabies virus CVS-N2c<sup>AG</sup> strain enhances retrograde synaptic transfer and neuronal viability**

Thomas R. Reardon, Andrew J. Murray, Gergely F. Turi, Christoph Wirblich,  
Katherine R. Croce, Matthias J. Schnell, Thomas M. Jessell and Attila Losonczy.

#### **Inventory of supplemental information**

A brief overview of how the Supplemental Figures relate to the main text is provided below.

**Supplementary Figure 1, related to Figure 1:** Neuro2a cells infected with CVS-N2c<sup>AG</sup>.

**Supplementary Figure 2, related to Figure 1:** RABV glycoprotein immunofluorescence after transfection with AAV constructs.

**Supplementary Figure 3, related to Figures 1-3:** Control experiments for the EnvA-pseudotyped CVS-N2c<sup>AG</sup> and the AAV constructs.

**Supplementary Table 1, related to Table 1:** Titer of viruses used in this study.

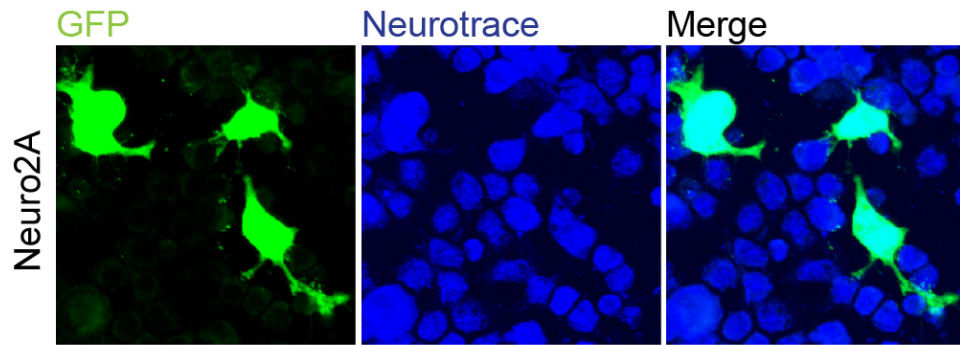

Supplementary Figure 1

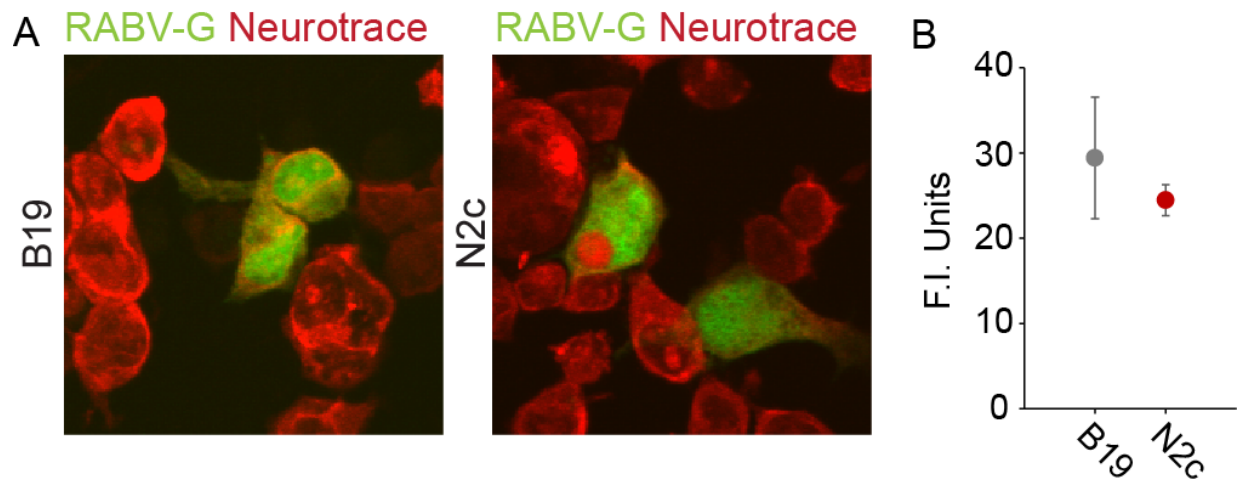

Supplementary Figure 2

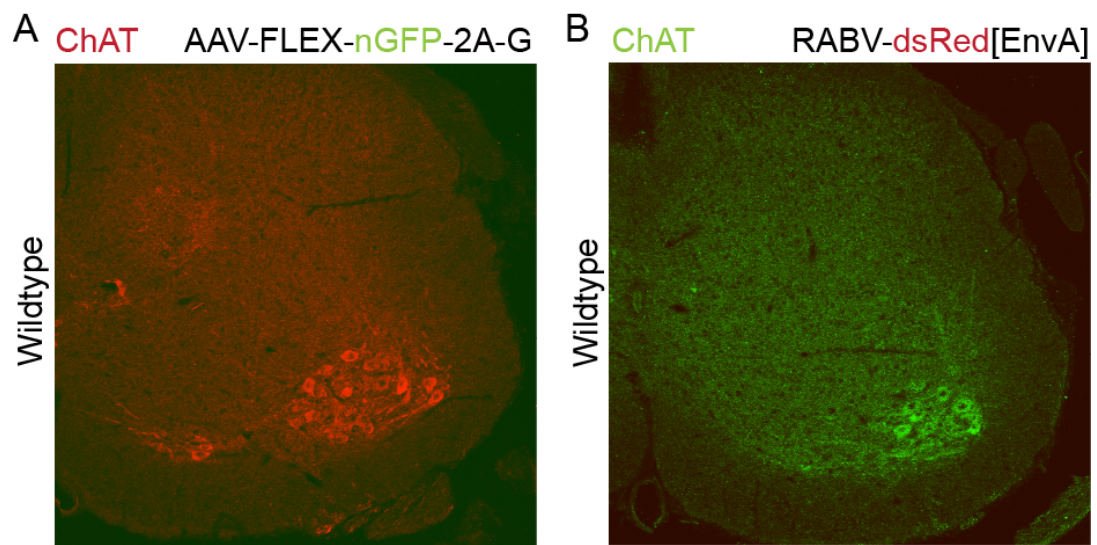

Supplementary Figure 3

| <b>Virus Type</b> | <b>Name</b>              | <b>Gene(s)</b>      | <b>Titer (units/ml)</b>                             | <b>First described</b>                            | <b>Estimated production time from rescue</b> |
|-------------------|--------------------------|---------------------|-----------------------------------------------------|---------------------------------------------------|----------------------------------------------|
| RABV-B19          | SAD-B19ΔG-GFP            | GFP                 | 1x10 <sup>9</sup> (WTG)<br>1x10 <sup>8</sup> (EnvA) | Wickersham et al. (2007)                          | 3-4 weeks*                                   |
| RABV-N2c          | CVS-N2cΔG-GFP            | GFP                 | 3x10 <sup>8</sup> (WTG)<br>2x10 <sup>7</sup> (EnvA) | Here                                              | 6-8 weeks<br>WTG + 2 weeks                   |
| RABV-B19          | SAD-B19ΔG-dsRed          | dsRed               | 1x10 <sup>9</sup> (WTG)<br>1x10 <sup>8</sup> (EnvA) | Osakada et al., 2011                              | 3-4 weeks*                                   |
| RABV-N2c          | CVS-N2cΔG-dsRed          | dsRed               | 2x10 <sup>8</sup> (WTG)<br>1x10 <sup>7</sup> (EnvA) | Here                                              | 6-8 weeks<br>WTG + 2 weeks                   |
| RABV-B19          | SAD-B19ΔG-ChR2-eYFP      | ChR2 & eYFP         | 1x10 <sup>9</sup> (WTG)                             | Osakada et al., 2011                              | 3-4 weeks*                                   |
| RABV-N2c          | CVS-N2cΔG-ChR2-eYFP      | ChR2 & eYFP         | 1x10 <sup>7</sup> (WTG)                             | Here                                              | 6-8 weeks<br>WTG + 2 weeks                   |
| RABV-B19          | SAD-B19ΔG-GCaMP6f        | GCaMP6f             | 2x10 <sup>9</sup> (WTG)                             | Here, but see Osakada et al., 2011 for B19-GCaMP3 | 3-4 weeks*                                   |
| RABV-N2c          | CVS-N2cΔG-GCaMP6f        | GCaMP6f             | 6x10 <sup>7</sup> (WTG)                             | Here                                              | 6-8 weeks<br>WTG + 2 weeks                   |
| AAV2/1            | AAV2/1-FLEX-nGFP-2A-B19G | HistoneGFP and B19G | 2x10 <sup>9</sup>                                   | Kaifosh et al., 2013 (and Addgene 37452, 2012)    | 1 week                                       |
| AAV2/1            | AAV2/1-FLEX-nGFP-2A-N2cG | HistoneGFP and N2cG | 2x10 <sup>9</sup>                                   | Here                                              | 1 week                                       |
| AAV2/1            | AAV2/1-FLEX-TVA-mCherry  | TVA and mCherry     | 2x10 <sup>9</sup>                                   | Watabe-Uchida et al., 2012                        | 1 week                                       |

**Supplementary Table 1.**

## ***Supplementary Figure Legends***

### **Supplementary Figure 1, related to Figure 1: Infection of Neuro2A cells with CVS-N2c $\Delta$ G.**

Neuro2A cells infected with CVS-N2c <sup>$\Delta$ G</sup>, expression after 4 days.

### **Supplementary Figure 2, related to Figure 1: Glycoprotein expression from AAV helpers.**

(A) Example images of Neuro2A cells infected with AAVs driving B19-G (left) or N2c-G (right). (B) Plot of rabies glycoprotein fluorescence intensity.

**Supplementary Figure 3, related to Figures 1-3: Selectivity of FLEX AAVs and EnvA-pseudotyped rabies virus.** (A) Injection of AAV-FLEX-nGFP-2A-G into spinal cord of wild-type mice. (B) Injection of RABV <sup>$\Delta$ G</sup>-N2c-dsRed[EnvA] into spinal cord of wild-type mice.

**Supplementary Table 1, related to Table 1: Viral vectors and titers used in this study.** Titers are expressed as infectious units/ml. \* see Wickersham et al., 2010.
